# Supplementary material for: Interpretation of CIs in clinical trials with non-significant results: systematic review and recommendations
Source: PubMed Central journal article supplement — BMJ Open. 2017 Jul 18;7(7):e017288. doi: 10.1136/bmjopen-2017-017288 (PMC5726092; doi:10.1136/bmjopen-2017-017288), 2017-07-18
Supplement: bmjopen-2017-017288supp001.pdf [file bmjopen-2017-017288supp001.pdf]

Appendix 1. Search Strategy.

("Lancet (London, England)"[Jour] OR "BMJ (Clinical research ed.)"[Jour] OR "JAMA"[Jour]  
OR "The New England journal of medicine"[Jour] OR "JAMA internal medicine"[Jour]  
OR "Annals of internal medicine"[Jour])

Filter: RCT

Date Search performed: 1/26/2015

"Create Date" Range : 2013-2014

2013 was included to ensure that all articles published in 2014 but created in Pubmed "ahead of print" in 2013 were captured. 744 articles were returned in the search and of those 379 were published in 2014.
