# Supplementary material for: Interpretation of CIs in clinical trials with non-significant results: systematic review and recommendations
Source: PubMed Central journal article supplement — BMJ Open. 2017 Jul 18;7(7):e017288. doi: 10.1136/bmjopen-2017-017288 (PMC5726092; doi:10.1136/bmjopen-2017-017288), 2017-07-18
Supplement: bmjopen-2017-017288supp003.pdf [file bmjopen-2017-017288supp003.pdf]

Supplemental Table 1

| Journal                         | N (%) providing an interpretation of the CI<br>(of studies with primary analyses not<br>yielding statistically significant results) |
|---------------------------------|-------------------------------------------------------------------------------------------------------------------------------------|
| Annals of Internal Medicine     | 2 / 5 (40%)                                                                                                                         |
| British Medical Journal         | 2 / 9 (22%)                                                                                                                         |
| JAMA                            | 6 / 29 (21%)                                                                                                                        |
| JAMA Internal Medicine          | 0 / 2 (0%)                                                                                                                          |
| New England Journal of Medicine | 4 / 39 (10%)                                                                                                                        |
| The Lancet                      | 3 / 15 (20%)                                                                                                                        |
